# Supplementary material for: Cell segmentation and tracking using CNN-based distance predictions and a graph-based matching strategy
Source: PubMed Central journal article supplement (PMC7723299; doi:10.1371/journal.pone.0243219), 2020-12-08

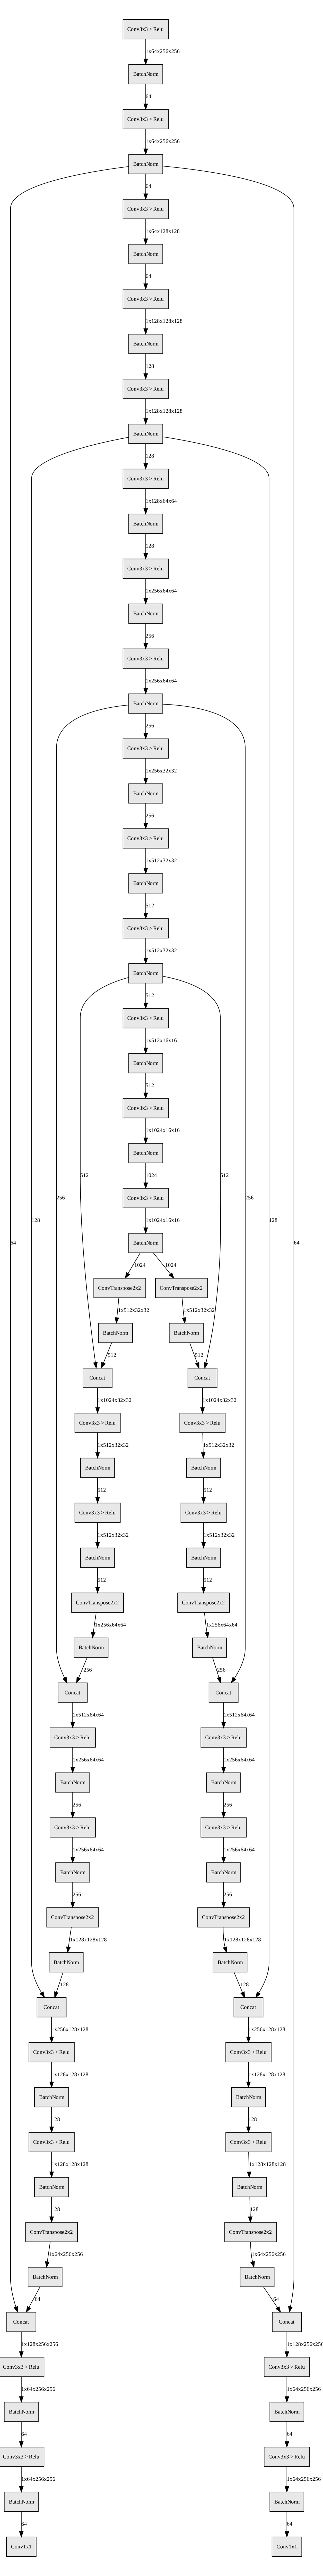

Supplement: pone.0243219.s001.pdf [file pone.0243219.s001.pdf]
