# Supplementary material for: Cell segmentation and tracking using CNN-based distance predictions and a graph-based matching strategy
Source: PubMed Central journal article supplement (PMC7723299; doi:10.1371/journal.pone.0243219), 2020-12-08

### CTC Training Set

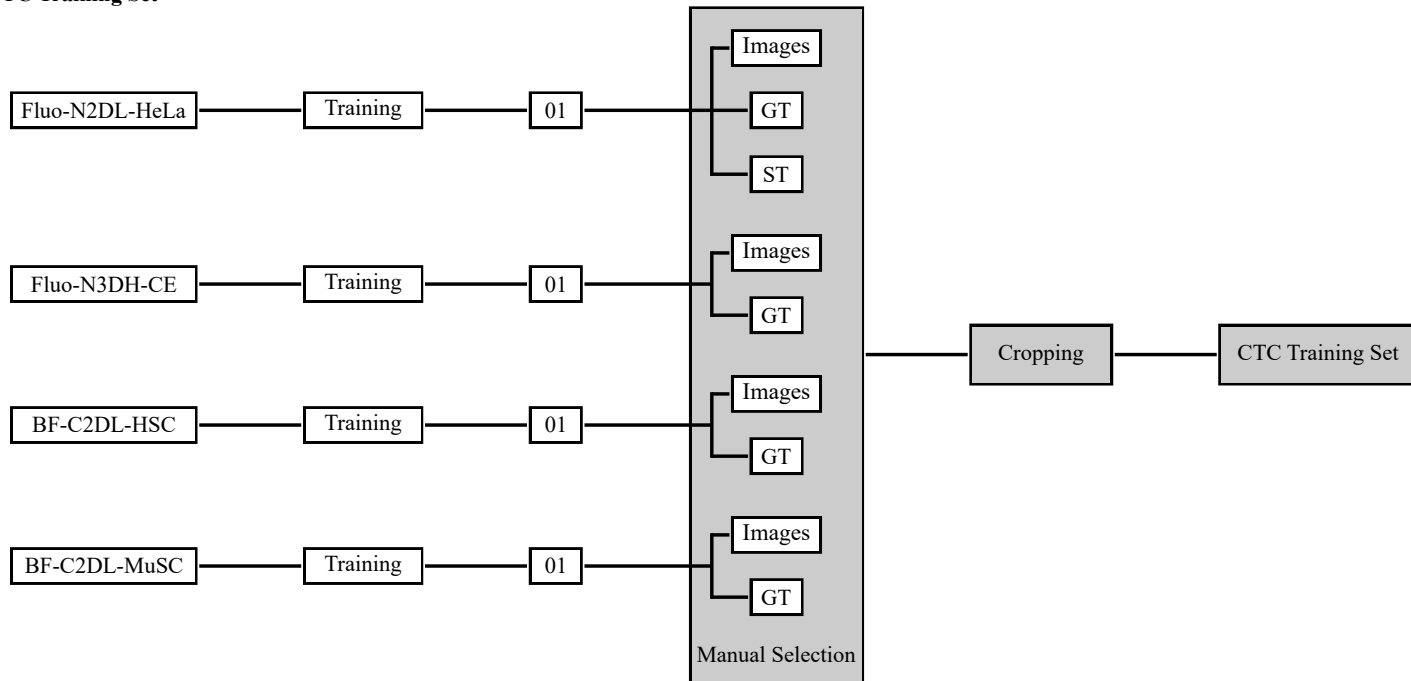

### Fluo-N2DL-HeLa Test Set

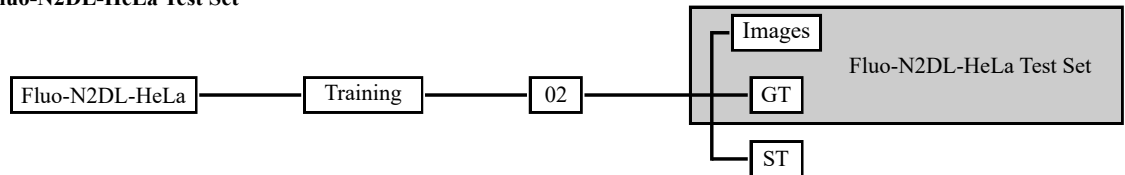

### Fluo-N3DH-CE Test Set

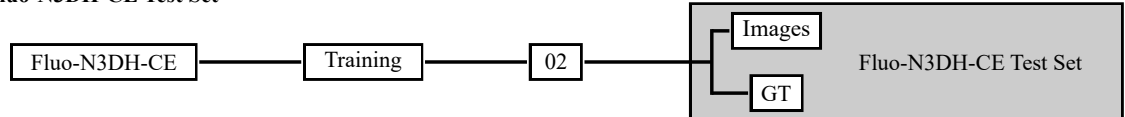

### BF-C2DL-HSC Test Set

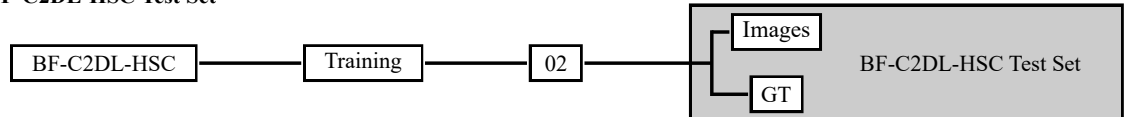

### BF-C2DL-MuSC Test Set

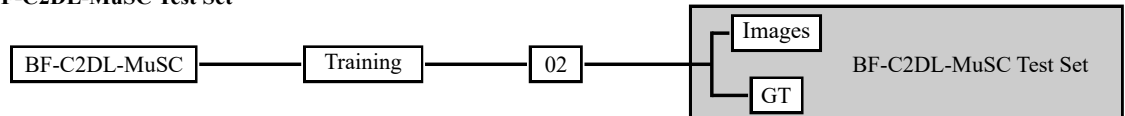

Supplement: pone.0243219.s002.pdf [file pone.0243219.s002.pdf]
