# Supplementary material for: Cell segmentation and tracking using CNN-based distance predictions and a graph-based matching strategy
Source: PubMed Central journal article supplement (PMC7723299; doi:10.1371/journal.pone.0243219), 2020-12-08
Supplement: pone.0243219.s003.pdf [file pone.0243219.s003.pdf]

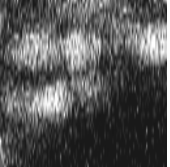

(a) Test Image

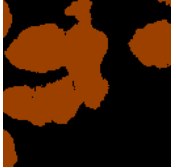

(b) Boundary

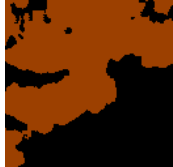

(c) Border

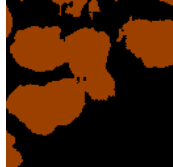

(d) Adapted Border

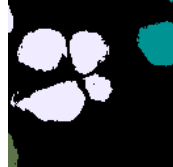

(e) Dual U-Net

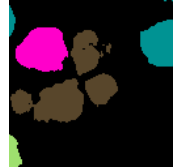

(f) J4

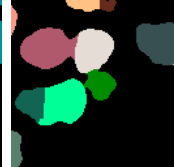

(g) Proposed
