# Supplementary material for: Cell segmentation and tracking using CNN-based distance predictions and a graph-based matching strategy
Source: PubMed Central journal article supplement (PMC7723299; doi:10.1371/journal.pone.0243219), 2020-12-08
Supplement: pone.0243219.s005.pdf [file pone.0243219.s005.pdf]

---

**BF-C2DL-HSC****BF-C2DL-MuSC****Fluo-N2DL-HeLa****Fluo-N3DH-CE**

---

Resolved merges

&lt; 1%

14%

19%

2%

---
